# Supplementary material
Source: ML conference proceedings conference paper supplement (https://openreview.net/forum?id=ojCJehWjy7)
Supplement: supplementary_material [file attachment]

TABLE II  
DESCRIPTIONS OF SUPPLEMENTARY MATERIALS

| Supplementary material | Description                                                                                                                                                                                                                                                                                                                                                                                                            |
|------------------------|------------------------------------------------------------------------------------------------------------------------------------------------------------------------------------------------------------------------------------------------------------------------------------------------------------------------------------------------------------------------------------------------------------------------|
| Project website        | <a href="https://mingrui-yu.github.io/retargeting">https://mingrui-yu.github.io/retargeting</a>                                                                                                                                                                                                                                                                                                                        |
| Appendix               | Supplementary results and implementation details are provided in Appendix, which includes hyper-parameters of the retargeting algorithm, the detailed formulation of the pinch objective, and additional quantitative results of kinematic posture retargeting on another trajectory involving finger crossing motions and on the Shadow Hand. The appendix is also available on the <a href="#">project website</a> . |
| Video                  | The video of the real-world experiments is available on the <a href="#">project website</a> , which demonstrates the real-world kinematic posture retargeting, three real-world manipulation tasks for evaluation, and additional trials on manipulation tasks of higher complexity.                                                                                                                                   |
| Source code            | The code is open-sourced on the <a href="#">project website</a> (GitHub), which includes the implementation of the retargeting algorithm and the evaluation on kinematic postures in simulation. We provide a detailed guideline for setting up everything and to launch the evaluation. Users are encouraged to report issues via GitHub.                                                                             |
| Dataset                | All human hand motion trajectories recorded by Apple Vision Pro in this study are provided on the <a href="#">project website</a> . The format of the dataset is described by the instructions in the corresponding README file.                                                                                                                                                                                       |
| CAD files              | The CAD files of the fingertips and the URDF of the whole robot (i.e., Panda arm + Leap Hand + fingertips) are provided on the <a href="#">project website</a> .                                                                                                                                                                                                                                                       |

## APPENDIX

## ADDITIONAL KINEMATIC POSTURE RETARGETING RESULTS

Three sets of additional quantitative results of kinematic posture retargeting on another trajectory involving finger crossing motions and on the Shadow Hand are shown in Fig. 5. Similar conclusions to the main text can be derived.

## ADDITIONAL DETAILS OF OBJECTIVE FORMULATION

**Relative position among fingertips:** The pinch term is formulated as:

$$\mathcal{L}_{\text{pinch}} = \sum_{i=1}^{N-1} s(d_i) \|\gamma_i^r - l(d_i) \hat{\gamma}_i^h\|^2, \quad (6)$$

where  $\gamma_i$  is the vector from the thumb fingertip to the fingertip of the  $i^{\text{th}}$  primary finger,  $d_i = \|\gamma_i^h\|$  and  $\hat{\gamma}_i^h = \frac{\gamma_i^h}{d_i}$ . Instead of using a discrete weight function as DexPilot, we use a continuous weight function

$$s(d_i) = \text{sigmoid}(d_i, \epsilon_1, 10),$$

where  $\text{sigmoid}(\cdot)$  is the sigmoid function defined as follows:

$$\text{sigmoid}(x, c, w) = \frac{1}{1 + e^{w(x-c)}}.$$

Our distance rescaling function is defined as follows:

$$l(d_i) = \begin{cases} 0, & d_i < \epsilon_2 \\ \frac{\epsilon_1 - \epsilon_2}{\epsilon_1 - \epsilon_2} (d_i - \epsilon_2), & \epsilon_2 \leq d_i \leq \epsilon_1 \\ d_i, & d_i > \epsilon_1, \end{cases} \quad (7)$$

where fingertip distance within pinching range  $[\epsilon_2, \epsilon_1]$  is linearly rescaled into  $[0, \epsilon_1]$ . This ensures a continuous transition in the pinching range and avoids sudden changes around the threshold  $\epsilon_1$ . In practice we set  $\epsilon_1 = 1 \times 10^{-1}$  m and  $\epsilon_2 = 1 \times 10^{-2}$  m.

**Overall hand shape:** To balance fingertip positions relative to the wrist and the thumb, we also set a switching weight for the fingertip position term  $\mathcal{L}_{\text{fingertip\_pos}}$ :

$$\mathcal{L}_{\text{fingertip\_pos}} = \sum_{i=1}^N \tilde{s}(d_i) \|\mathbf{v}_i^r - \mathbf{v}_i^h\|^2, \quad (8)$$

where

$$\tilde{s}(d_i) = \text{sigmoid}(d_i, \epsilon_1, -10),$$

so that the sum of  $s(d_i)$  and  $\tilde{s}(d_i)$  will be a fixed number. In ablation studies where the pinch term is removed (A1, A6 and A8), we set  $\tilde{s}(d_i)$  to be a constant 1.0 as in (2).

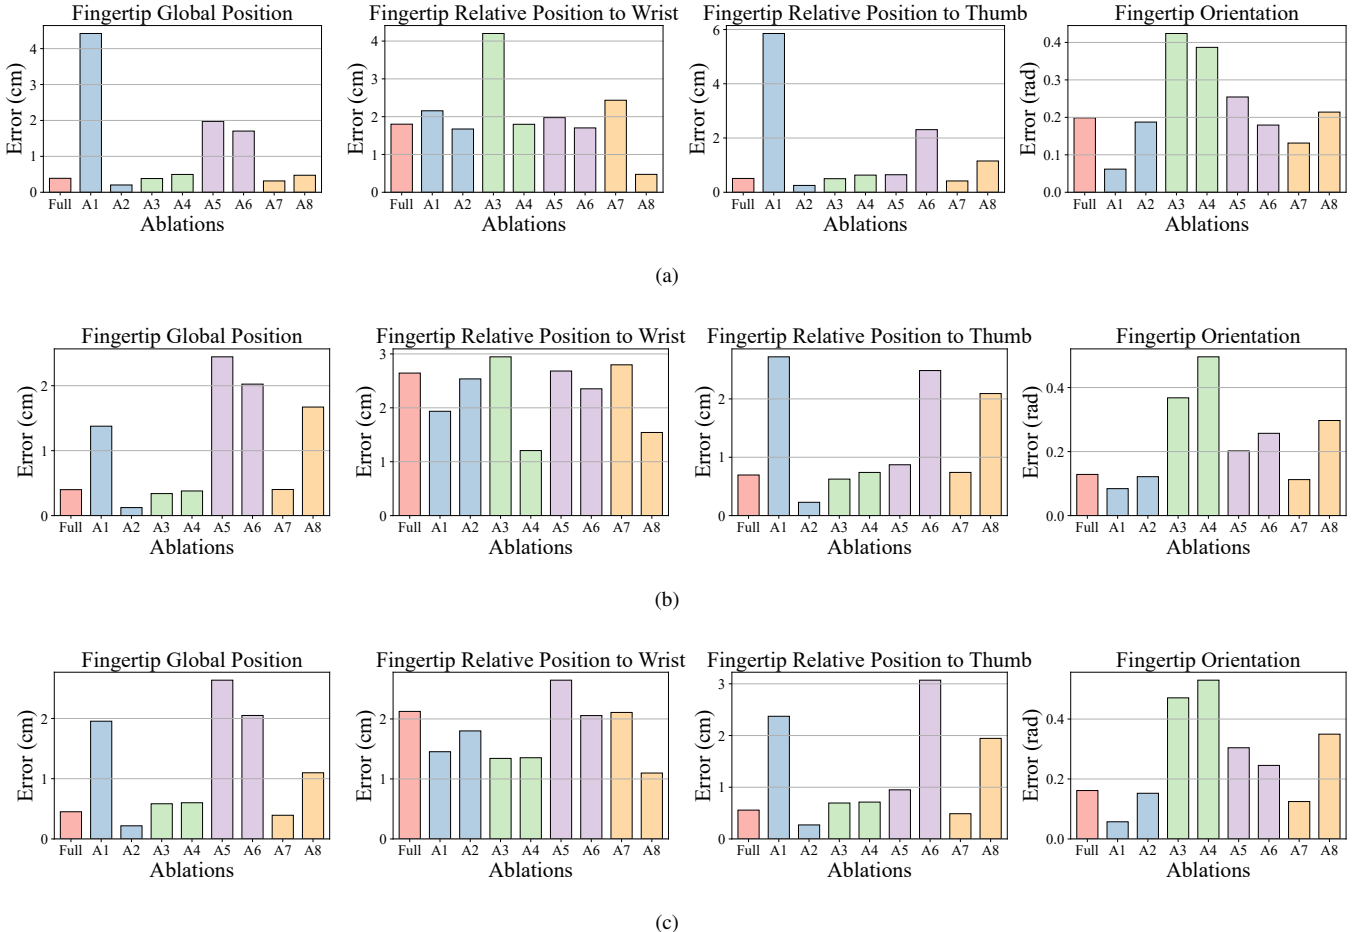

Fig. 5. Additional results on kinematic posture Retargeting. (a) Kinematic posture retargeting results using Leap hand on another trajectory involving finger crossing motion. (b) Kinematic posture retargeting results using Shadow hand on the same pinch motion trajectory as in the main text. (c) Kinematic posture retargeting results using Shadow hand on the trajectory involving finger crossing motion.

## IMPLEMENTATION

The hyper-parameters used in the retargeting objective are listed in Table III.

TABLE III  
HYPER-PARAMETERS

| Hyper Parameter                  | Value                                                |
|----------------------------------|------------------------------------------------------|
| $\lambda_1$                      | 10                                                   |
| $\lambda_2$                      | 0.1                                                  |
| $\lambda_3$                      | 1                                                    |
| $\lambda_4$                      | 10                                                   |
| $\lambda_5$                      | 10                                                   |
| $w_j^{\text{pos}}$ (Leap hand)   | 0.5, $j = 7, 11, 15, 18$<br>0.1, $j = 20$<br>0, else |
| $w_j^{\text{pos}}$ (Shadow Hand) | 0.5, $j = 9, 13, 17, 22$<br>0.1, $j = 26$<br>0, else |
| $w_j^{\text{vel}}$ (Leap hand)   | 0.1, $j = 0 \sim 6$<br>0.01, $j = 7 \sim 22$         |
| $w_j^{\text{vel}}$ (Shadow Hand) | 0.1, $j = 0 \sim 6$<br>0.01, $j = 7 \sim 30$         |

A relatively small weight of 0.1 is assigned to the wrist orientation term ( $\lambda_2$ ), as the objective aims to emphasize fingertip tracking accuracy rather than wrist pose accuracy.

For the weights of joint position and velocity regularization terms  $w_j^{\text{joint}}$  and  $w_j^{\text{vel}}$ , index  $j$  from 0 to 6 corresponds to the joints of the Panda arm, while indices  $j = 7$  to 22 and  $j = 7$  to 30 correspond to the joints of the Leap hand and the Shadow Hand respectively. Note that here we assume all DoFs of the Shadow Hand are actuated. For Leap hand,  $j = 7, 11, 15$  correspond to the abduction/adduction joints of index, middle and ring,  $j = 18$  corresponds to the DIP joint of the ring, and  $j = 20$  corresponds to the rotation of the thumb. For Shadow Hand,  $j = 9, 13, 17, 22$  correspond to the finger movements of index, middle, ring and little finger in the palm plane, while  $j = 26$  corresponds to the rotation of the thumb. For joints with non-zero position regularization, the pre-defined joint configurations are set to  $\bar{q}_j = 0$ .

In our implementation, we rescale the size of the human hand by a factor of 1.5 for the Leap hand and 1.0 for the Shadow Hand to address the size difference between human and robot hand. In the real-world experiments, the retargeting control frequency is 20 Hz, and we use an exponential moving average with  $\alpha_{\text{ema}} = 0.3$  to further smoothen the joint movements:

$$\mathbf{q}_t = \alpha_{\text{ema}} \cdot \mathbf{q}_t + (1 - \alpha_{\text{ema}}) \cdot \mathbf{q}_{t-1} \quad (9)$$
